# Supplementary material for: How to judge whether QSAR/read-across predictions can be trusted: a novel approach for establishing a model's applicability domain
Source: Royal Society of Chemistry journal article supplement (doi:10.1039/c7en00774d), 2017-12-08
Supplement: c7en00774d1.pdf [file c7en00774d1.pdf]

# **How to judge whether QSAR/read-across predictions can be trusted? Novel approach for establishing model's applicability domain**

*Agnieszka Gajewicz*

*Laboratory of Environmental Chemometrics, Faculty of Chemistry, University of Gdansk, Gdansk,  
Poland*

## **Supplementary materials**

---

**Corresponding author:** A. Gajewicz, Laboratory of Environmental Chemometrics, Faculty of Chemistry, University of Gdansk, Wita Stwosza 63, 80-308 Gdansk, Poland  
Phone: (+48 58) 523 52 46; fax: (+48 58) 523 50 12; e-mail: [a.gajewicz@qsar.eu.org](mailto:a.gajewicz@qsar.eu.org)

## Case Study 1

**Table S1.** Descriptors used for Nano-QSAR model development along with experimentally observed and predicted values of nanotoxicity to *E. coli* bacteria for training and validation compounds (MeOx NPs) reported by Pathakoti *et al.*<sup>[1]</sup>

| MeOx                           | QMELECT | LZELEHHO | Autoscaled QMELECT | Autoscaled LZELEHHO | Set* | Experimental $-\log(\text{LC}_{50})$ | Predicted $-\log(\text{LC}_{50})$ | Residuals | Standardized cross-validated residuals | Leverages |
|--------------------------------|---------|----------|--------------------|---------------------|------|--------------------------------------|-----------------------------------|-----------|----------------------------------------|-----------|
| Al <sub>2</sub> O <sub>3</sub> | 0.10    | 0.21     | -0.36              | 0.95                | T    | 2.42                                 | 1.78                              | 0.64      | 1.26                                   | 0.22      |
| CoO                            | 0.10    | 0.17     | -0.49              | -0.25               | T    | 3.13                                 | 3.41                              | -0.28     | -0.72                                  | 0.10      |
| Cr <sub>2</sub> O <sub>3</sub> | 0.10    | 0.20     | -0.55              | 0.61                | T    | 2.06                                 | 2.15                              | -0.09     | -0.36                                  | 0.18      |
| CuO                            | 0.13    | 0.18     | 1.05               | 0.02                | T    | 4.24                                 | 4.06                              | 0.18      | 0.22                                   | 0.19      |
| In <sub>2</sub> O <sub>3</sub> | 0.10    | 0.20     | -0.65              | 0.53                | T    | 2.83                                 | 2.18                              | 0.65      | 1.22                                   | 0.19      |
| TiO <sub>2</sub>               | 0.11    | 0.19     | -0.10              | 0.50                | T    | 2.14                                 | 2.6                               | -0.46     | -1.07                                  | 0.11      |
| Y <sub>2</sub> O <sub>3</sub>  | 0.10    | 0.13     | -0.60              | -1.40               | T    | 5.79                                 | 4.98                              | 0.81      | 1.67                                   | 0.24      |
| ZnO                            | 0.12    | 0.13     | 0.97               | -1.30               | T    | 5.8                                  | 5.9                               | -0.1      | -0.50                                  | 0.49      |
| ZrO <sub>2</sub>               | 0.11    | 0.18     | 0.02               | 0.20                | T    | 2.58                                 | 3.12                              | -0.54     | -1.18                                  | 0.08      |
| Fe <sub>2</sub> O <sub>3</sub> | 0.10    | 0.17     | -0.45              | -0.08               | T    | 2.4                                  | 3.19                              | -0.79     | -1.68                                  | 0.10      |
| La <sub>2</sub> O <sub>3</sub> | 0.09    | 0.12     | -1.17              | -1.63               | T    | 4.96                                 | 4.93                              | 0.03      | -0.09                                  | 0.31      |
| Sb <sub>2</sub> O <sub>3</sub> | 0.10    | 0.17     | -0.29              | -0.10               | T    | 3.12                                 | 3.33                              | -0.21     | -0.56                                  | 0.08      |
| SiO <sub>2</sub>               | 0.15    | 0.24     | 2.61               | 1.94                | T    | 2.54                                 | 2.37                              | 0.17      | 0.80                                   | 0.70      |
| NiO                            | 0.10    | 0.18     | -0.37              | 0.09                | V    | 3.79                                 | 3.01                              | 0.78      | 1.19                                   | 0.10      |
| SnO <sub>2</sub>               | 0.14    | 0.22     | 1.94               | 1.34                | V    | 2.53                                 | 2.77                              | -0.24     | -0.58                                  | 0.41      |
| V <sub>2</sub> O <sub>3</sub>  | 0.11    | 0.17     | 0.23               | -0.10               | V    | 3.48                                 | 3.68                              | -0.2      | -0.52                                  | 0.09      |
| Bi <sub>2</sub> O <sub>3</sub> | 0.10    | 0.18     | -0.26              | 0.20                | V    | 3.55                                 | 2.92                              | 0.63      | 0.92                                   | 0.09      |

\* T – training set; V – validation set; QMELECT – the absolute electronegativity of the metal atom; LZELEHHO – the absolute electronegativity of the metal oxide

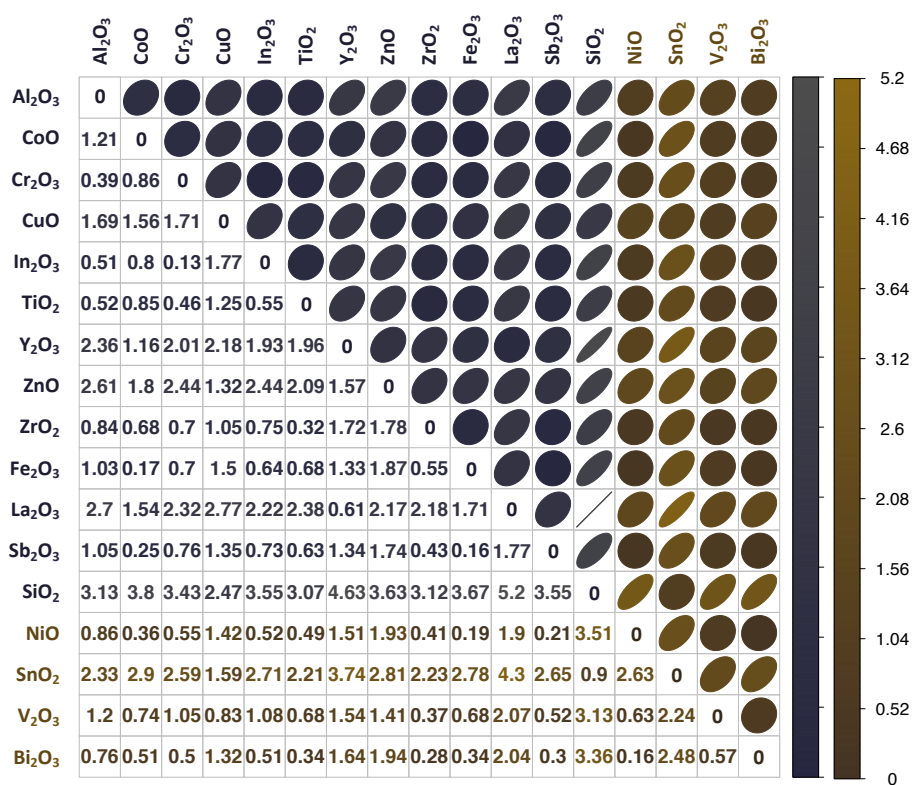

**Figure S1.** Euclidean distance matrix between the training (indicated in gray color) and validation (indicated in goldenrod color) compounds. The color intensity and shape of the ellipses displayed in the upper triangular part of a distance matrix reflect the values of the corresponding Euclidean distances expressed in numerical forms in the lower triangular part of this matrix. The smallest Euclidean distances (indicated as big circles) are considered as significant. In contrast, the highest distances that reflect the dissimilarity between compounds are considered as insignificant and shown as a thin ellipse.

**Table S2.** Input matrix data for 95% and 99% confidence interval boundaries estimation using the Student's *t*-distribution and developed in-house *R*-code

| MeOx                           | Average Euclidean distance | Standardized cross-validated residuals | Set |
|--------------------------------|----------------------------|----------------------------------------|-----|
| Al <sub>2</sub> O <sub>3</sub> | 1.50                       | 1.26                                   | 1   |
| CoO                            | 1.22                       | -0.72                                  | 1   |
| Cr <sub>2</sub> O <sub>3</sub> | 1.33                       | -0.36                                  | 1   |
| CuO                            | 1.72                       | 0.22                                   | 1   |
| In <sub>2</sub> O <sub>3</sub> | 1.34                       | 1.22                                   | 1   |
| TiO <sub>2</sub>               | 1.23                       | -1.07                                  | 1   |
| Y <sub>2</sub> O <sub>3</sub>  | 1.90                       | 1.67                                   | 1   |
| ZnO                            | 2.12                       | -0.50                                  | 1   |
| ZrO <sub>2</sub>               | 1.18                       | -1.18                                  | 1   |
| Fe <sub>2</sub> O <sub>3</sub> | 1.17                       | -1.68                                  | 1   |
| La <sub>2</sub> O <sub>3</sub> | 2.30                       | -0.09                                  | 1   |
| Sb <sub>2</sub> O <sub>3</sub> | 1.14                       | -0.56                                  | 1   |
| SiO <sub>2</sub>               | 3.60                       | 0.80                                   | 1   |
| NiO                            | 1.07                       | 1.19                                   | 2   |
| SnO <sub>2</sub>               | 2.60                       | -0.58                                  | 2   |
| V <sub>2</sub> O <sub>3</sub>  | 1.18                       | -0.52                                  | 2   |
| Bi <sub>2</sub> O <sub>3</sub> | 1.06                       | 0.92                                   | 2   |

**Table S3.** Results on the applicability domain determination using: range-based method, geometrical-based method, distance-based method and standardization approach

|                      | Basic theory of the standardization approach |     |                  |
|----------------------|----------------------------------------------|-----|------------------|
|                      | MeOx                                         | Set | AD Info.         |
| Range-based approach | Al <sub>2</sub> O <sub>3</sub>               | T   | not an X-outlier |
|                      | CoO                                          | T   | not an X-outlier |
|                      | Cr <sub>2</sub> O <sub>3</sub>               | T   | not an X-outlier |
|                      | CuO                                          | T   | not an X-outlier |
|                      | In <sub>2</sub> O <sub>3</sub>               | T   | not an X-outlier |
|                      | TiO <sub>2</sub>                             | T   | not an X-outlier |
|                      | Y <sub>2</sub> O <sub>3</sub>                | T   | not an X-outlier |
|                      | ZnO                                          | T   | not an X-outlier |
|                      | ZrO <sub>2</sub>                             | T   | not an X-outlier |
|                      | Fe <sub>2</sub> O <sub>3</sub>               | T   | not an X-outlier |
|                      | La <sub>2</sub> O <sub>3</sub>               | T   | not an X-outlier |
|                      |                                              |     |                  |

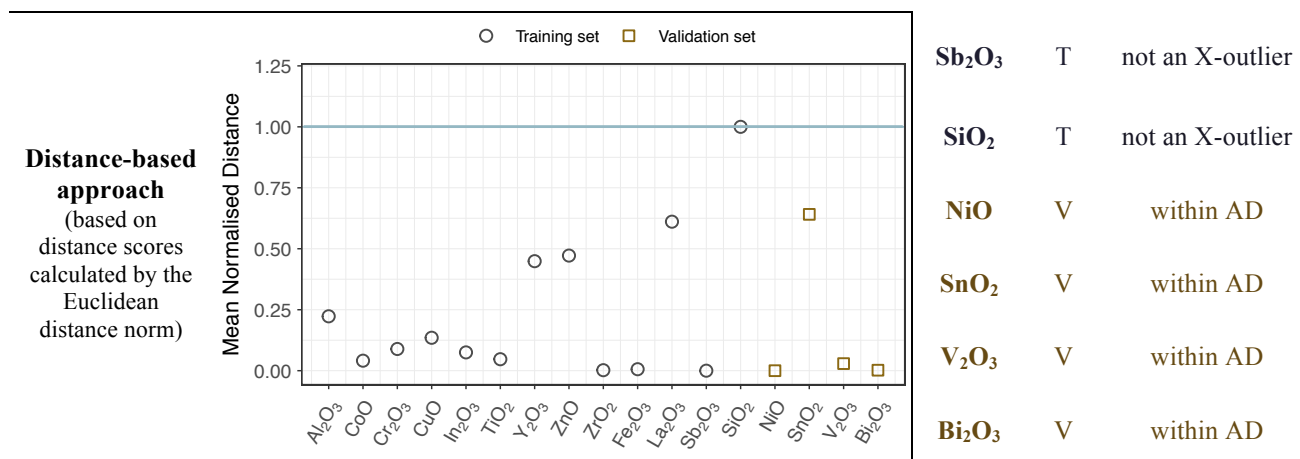

## Case Study 2

**Table S4.** Descriptors used for Nano-QSAR model development along with experimentally observed and predicted values of nanotoxicity to *E. coli* bacteria for training and validation compounds (MeOx NPs) reported by Mu *et al.*<sup>[2]</sup>

| MeOx                               | $\Delta H_{me^+}$ | Z/r  | Autoscaled $\Delta H_{me^+}$ | Autoscaled Z/r | Set* | Experimental $\log(1/EC_{50})$ | Predicted $\log(1/EC_{50})$ | Residuals | Standardized residuals | Leverages |
|------------------------------------|-------------------|------|------------------------------|----------------|------|--------------------------------|-----------------------------|-----------|------------------------|-----------|
| <b>ZnO</b>                         | 662.4             | 2.70 | -1.29                        | -1.12          | T    | 3.45                           | 3.39                        | 0.06      | 0.31                   | 0.17      |
| <b>CuO</b>                         | 713.7             | 2.74 | -1.14                        | -1.09          | T    | 3.20                           | 3.35                        | -0.15     | -0.88                  | 0.15      |
| <b>Y<sub>2</sub>O<sub>3</sub></b>  | 837.2             | 3.33 | -0.77                        | -0.64          | T    | 2.87                           | 3.13                        | -0.26     | -1.51                  | 0.10      |
| <b>Bi<sub>2</sub>O<sub>3</sub></b> | 1137.4            | 2.91 | 0.10                         | -0.96          | T    | 2.82                           | 2.87                        | -0.05     | -0.32                  | 0.31      |
| <b>In<sub>2</sub>O<sub>3</sub></b> | 1271.1            | 3.75 | 0.50                         | -0.32          | T    | 2.81                           | 2.62                        | 0.19      | 1.05                   | 0.20      |
| <b>Al<sub>2</sub>O<sub>3</sub></b> | 1187.8            | 5.56 | 0.25                         | 1.06           | T    | 2.49                           | 2.46                        | 0.03      | 0.14                   | 0.23      |
| <b>Fe<sub>2</sub>O<sub>3</sub></b> | 1363.4            | 5.46 | 0.77                         | 0.98           | T    | 2.29                           | 2.25                        | 0.04      | 0.19                   | 0.13      |
| <b>SnO<sub>2</sub></b>             | 1717.3            | 5.80 | 1.80                         | 1.24           | T    | 2.01                           | 1.89                        | 0.12      | 0.65                   | 0.29      |
| <b>TiO<sub>2</sub></b>             | 1575.7            | 6.56 | 1.39                         | 1.83           | T    | 1.74                           | 1.95                        | -0.21     | -1.22                  | 0.29      |
| <b>V<sub>2</sub>O<sub>3</sub></b>  | 1097.7            | 4.69 | -0.01                        | 0.40           | T    | 3.14                           | 2.69                        | 0.45      | 2.52                   | 0.10      |
| <b>Sb<sub>2</sub>O<sub>3</sub></b> | 1233.1            | 3.95 | 0.38                         | -0.17          | T    | 2.64                           | 2.62                        | 0.02      | 0.08                   | 0.13      |
| <b>ZrO<sub>2</sub></b>             | 1357.7            | 5.56 | 0.75                         | 1.06           | T    | 2.15                           | 2.31                        | -0.16     | -0.94                  | 0.14      |
| <b>CoO</b>                         | 594.6             | 3.08 | -1.48                        | -0.84          | T    | 3.51                           | 3.39                        | 0.12      | 0.65                   | 0.25      |
| <b>NiO</b>                         | 596.9             | 2.90 | -1.48                        | -0.97          | T    | 3.45                           | 3.42                        | 0.03      | 0.14                   | 0.22      |
| <b>Cr<sub>2</sub>O<sub>3</sub></b> | 1266.6            | 4.84 | 0.48                         | 0.51           | T    | 2.51                           | 2.48                        | 0.03      | 0.14                   | 0.08      |
| <b>La<sub>2</sub>O<sub>3</sub></b> | 1017.2            | 2.91 | -0.25                        | -0.96          | T    | 2.87                           | 3.04                        | -0.17     | -1.00                  | 0.19      |
| <b>Co<sub>3</sub>O<sub>4</sub></b> | 811.1             | 4.60 | -0.85                        | 0.33           | V    | 3.00                           | 2.94                        | 0.06      | 0.31                   | 0.36      |
| <b>Mn<sub>2</sub>O<sub>3</sub></b> | 1018.0            | 5.17 | -0.25                        | 0.77           | V    | 3.08                           | 2.77                        | 0.36      | 2.01                   | 0.28      |

\* T – training set; V – validation set;  $\Delta H_{me^+}$  – the enthalpy of formation of a gaseous cation; Z/r – polarization force parameters.

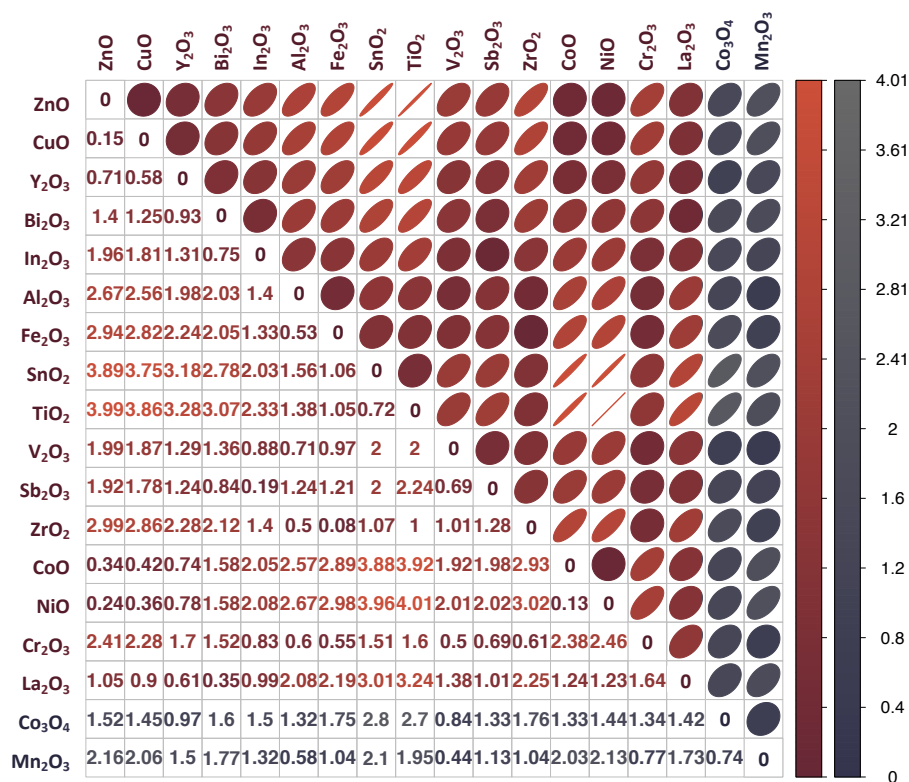

**Figure S2.** Euclidean distance matrix between the training (indicated in tomato color) and validation (indicated in gray color) compounds. The color intensity and shape of the ellipses displayed in the upper triangular part of a distance matrix reflect the values of the corresponding Euclidean distances expressed in numerical forms in the lower triangular part of this matrix. The smallest Euclidean distances (indicated as big circles) are considered as significant. In contrast, the highest distances that reflect the dissimilarity between compounds are considered as insignificant and shown as a thin ellipse.

**Table S5.** Input matrix data for 95% and 99% confidence interval boundaries estimation using the Student's *t*-distribution and developed in-house *R*-code

| MeOx                           | Average Euclidean distance | Standardized residuals | Set |
|--------------------------------|----------------------------|------------------------|-----|
| ZnO                            | 1.91                       | 0.31                   | 1   |
| CuO                            | 1.82                       | -0.88                  | 1   |
| Y <sub>2</sub> O <sub>3</sub>  | 1.52                       | -1.51                  | 1   |
| Bi <sub>2</sub> O <sub>3</sub> | 1.57                       | -0.32                  | 1   |
| In <sub>2</sub> O <sub>3</sub> | 1.42                       | 1.05                   | 1   |
| Al <sub>2</sub> O <sub>3</sub> | 1.63                       | 0.14                   | 1   |
| Fe <sub>2</sub> O <sub>3</sub> | 1.66                       | 0.19                   | 1   |
| SnO <sub>2</sub>               | 2.43                       | 0.65                   | 1   |
| TiO <sub>2</sub>               | 2.51                       | -1.22                  | 1   |
| V <sub>2</sub> O <sub>3</sub>  | 1.37                       | 2.52                   | 1   |
| Sb <sub>2</sub> O <sub>3</sub> | 1.36                       | 0.08                   | 1   |
| ZrO <sub>2</sub>               | 1.69                       | -0.94                  | 1   |
| CoO                            | 1.93                       | 0.65                   | 1   |
| NiO                            | 1.97                       | 0.14                   | 1   |
| Cr <sub>2</sub> O <sub>3</sub> | 1.42                       | 0.14                   | 1   |
| La <sub>2</sub> O <sub>3</sub> | 1.54                       | -1.00                  | 1   |
| Co <sub>3</sub> O <sub>4</sub> | 1.57                       | 0.31                   | 2   |
| Mn <sub>2</sub> O <sub>3</sub> | 1.49                       | 2.01                   | 2   |

**Table S6.** Results on the applicability domain determination using: range-based method, geometrical-based method, distance-based method and standardization approach

|                                    |                                                                                     | <b>Basic theory of the standardization approach</b>                                                    |                                                                                      |                  |
|------------------------------------|-------------------------------------------------------------------------------------|--------------------------------------------------------------------------------------------------------|--------------------------------------------------------------------------------------|------------------|
|                                    |                                                                                     | <b>MeOx</b>                                                                                            | <b>Set</b>                                                                           | <b>AD Info.</b>  |
| <b>Range-based approach</b>        | 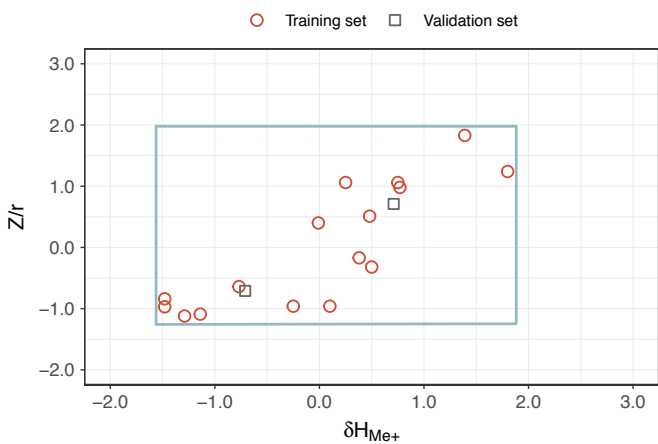  | <b>ZnO</b>                                                                                             | T                                                                                    | not an X-outlier |
|                                    |                                                                                     | <b>CuO</b>                                                                                             | T                                                                                    | not an X-outlier |
|                                    |                                                                                     | <b>Y<sub>2</sub>O<sub>3</sub></b>                                                                      | T                                                                                    | not an X-outlier |
| <b>Geometric approach</b>          |  | <b>Bi<sub>2</sub>O<sub>3</sub></b>                                                                     | T                                                                                    | not an X-outlier |
|                                    |                                                                                     | <b>In<sub>2</sub>O<sub>3</sub></b>                                                                     | T                                                                                    | not an X-outlier |
|                                    |                                                                                     | <b>Al<sub>2</sub>O<sub>3</sub></b>                                                                     | T                                                                                    | not an X-outlier |
|                                    |                                                                                     | <b>Fe<sub>2</sub>O<sub>3</sub></b>                                                                     | T                                                                                    | not an X-outlier |
|                                    |                                                                                     | <b>SnO<sub>2</sub></b>                                                                                 | T                                                                                    | not an X-outlier |
|                                    |                                                                                     | <b>TiO<sub>2</sub></b>                                                                                 | T                                                                                    | not an X-outlier |
|                                    |                                                                                     | <b>V<sub>2</sub>O<sub>3</sub></b>                                                                      | T                                                                                    | not an X-outlier |
|                                    |                                                                                     | <b>Sb<sub>2</sub>O<sub>3</sub></b>                                                                     | T                                                                                    | not an X-outlier |
|                                    |                                                                                     | <b>ZrO<sub>2</sub></b>                                                                                 | T                                                                                    | not an X-outlier |
|                                    |                                                                                     | <b>Distance-based approach</b><br>(based on distance scores calculated by the Euclidean distance norm) |  | <b>CoO</b>       |
| <b>NiO</b>                         | T                                                                                   |                                                                                                        |                                                                                      | not an X-outlier |
| <b>Cr<sub>2</sub>O<sub>3</sub></b> | T                                                                                   |                                                                                                        |                                                                                      | not an X-outlier |
| <b>La<sub>2</sub>O<sub>3</sub></b> | T                                                                                   |                                                                                                        |                                                                                      | not an X-outlier |
| <b>Co<sub>3</sub>O<sub>4</sub></b> | V                                                                                   |                                                                                                        |                                                                                      | within AD        |
| <b>Mn<sub>2</sub>O<sub>3</sub></b> | V                                                                                   |                                                                                                        |                                                                                      | within AD        |
|                                    |                                                                                     |                                                                                                        |                                                                                      |                  |

### Case Study 3

**Table S7.** Descriptors used for Nano-QSAR model development along with experimentally observed and predicted values of nanotoxicity to HaCaT cells for training and validation compounds (MeOx NPs) reported by Pan *et al.*<sup>[3]</sup>

| MeOx                           | DCW (1,3) | Autoscaled DCW(1,3) | Set* | Experimental log(1/LC <sub>50</sub> ) | Predicted log(1/LC <sub>50</sub> ) | Residuals | Standardized cross-validated residuals | Leverages |
|--------------------------------|-----------|---------------------|------|---------------------------------------|------------------------------------|-----------|----------------------------------------|-----------|
| Al <sub>2</sub> O <sub>3</sub> | 20.32     | -1.82               | T    | 1.85                                  | 1.82                               | 0.03      | -0.01                                  | 0.35      |
| Bi <sub>2</sub> O <sub>3</sub> | 26.58     | -0.12               | T    | 2.50                                  | 2.47                               | 0.03      | -0.10                                  | 0.08      |
| Cr <sub>2</sub> O <sub>3</sub> | 24.77     | -0.61               | T    | 2.30                                  | 2.28                               | 0.02      | -0.18                                  | 0.11      |
| In <sub>2</sub> O <sub>3</sub> | 31.20     | 1.13                | T    | 2.92                                  | 2.95                               | -0.03     | -0.54                                  | 0.18      |
| La <sub>2</sub> O <sub>3</sub> | 30.57     | 0.96                | T    | 2.87                                  | 2.88                               | -0.01     | -0.42                                  | 0.15      |
| NiO                            | 28.85     | 0.49                | T    | 2.49                                  | 2.70                               | -0.21     | -1.86                                  | 0.10      |
| Sb <sub>2</sub> O <sub>3</sub> | 25.06     | -0.54               | T    | 2.31                                  | 2.31                               | 0.00      | -0.32                                  | 0.10      |
| SnO <sub>2</sub>               | 28.62     | 0.43                | T    | 2.67                                  | 2.68                               | -0.01     | -0.40                                  | 0.09      |
| V <sub>2</sub> O <sub>3</sub>  | 24.20     | -0.77               | T    | 2.24                                  | 2.22                               | 0.02      | -0.19                                  | 0.13      |
| WO <sub>3</sub>                | 27.41     | 0.10                | T    | 2.56                                  | 2.55                               | 0.01      | -0.28                                  | 0.08      |
| ZnO                            | 33.34     | 1.71                | T    | 3.32                                  | 3.17                               | 0.15      | 1.11                                   | 0.32      |
| ZrO <sub>2</sub>               | 22.16     | -1.32               | T    | 2.02                                  | 2.01                               | 0.01      | -0.24                                  | 0.22      |
| Mn <sub>2</sub> O <sub>3</sub> | 28.31     | 0.35                | T    | 2.64                                  | 2.65                               | -0.01     | -0.38                                  | 0.09      |
| CoO                            | 25.85     | -0.32               | V    | 2.83                                  | 2.39                               | 0.44      | 2.51                                   | 0.09      |
| Fe <sub>2</sub> O <sub>3</sub> | 21.79     | -1.42               | V    | 2.05                                  | 1.97                               | 0.08      | 0.18                                   | 0.24      |
| SiO <sub>2</sub>               | 21.06     | -1.62               | V    | 2.12                                  | 1.90                               | 0.23      | 1.13                                   | 0.30      |
| TiO <sub>2</sub>               | 21.28     | -1.56               | V    | 1.76                                  | 1.92                               | -0.16     | -1.35                                  | 0.28      |
| Y <sub>2</sub> O <sub>3</sub>  | 21.64     | -1.46               | V    | 2.21                                  | 1.96                               | 0.26      | 1.33                                   | 0.26      |

\* T – training set; V – validation set; DCW(1,3) – SMILES-based optimal molecular descriptor which includes: aggregation size; individual size; mass percentage of metal elements; cationic charge and molecular weight.

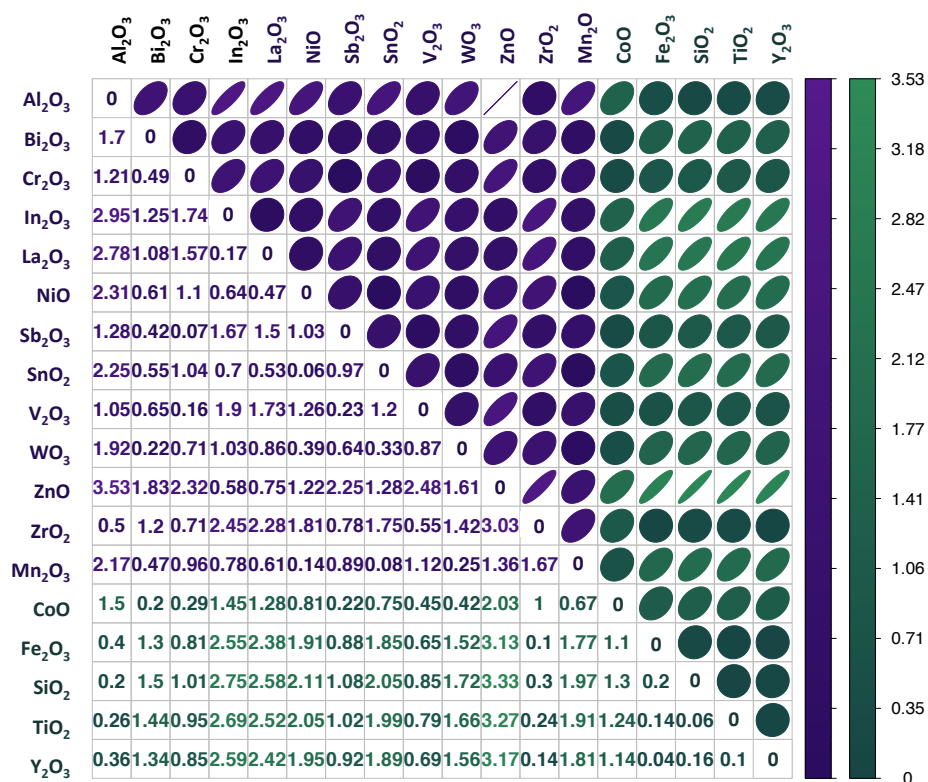

**Figure S3.** Euclidean distance matrix between the training (indicated in purple color) and validation (indicated in seagreen color) compounds. The color intensity and shape of the ellipses displayed in the upper triangular part of a distance matrix reflect the values of the corresponding Euclidean distances expressed in numerical forms in the lower triangular part of this matrix. The smallest Euclidean distances (indicated as big circles) are considered as significant. In contrast, the highest distances that reflect the dissimilarity between compounds are considered as insignificant and shown as a thin ellipse.

**Table S8.** Input matrix data for 95% and 99% confidence interval boundaries estimation using the Student's *t*-distribution and developed in-house *R*-code

| <b>MeOx</b>                        | <b>Average<br/>Euclidean<br/>distance</b> | <b>Standardized<br/>cross-validated<br/>residuals</b> | <b>Set</b> |
|------------------------------------|-------------------------------------------|-------------------------------------------------------|------------|
| <b>Al<sub>2</sub>O<sub>3</sub></b> | 1.97                                      | -0.01                                                 | 1          |
| <b>Bi<sub>2</sub>O<sub>3</sub></b> | 0.87                                      | -0.10                                                 | 1          |
| <b>Cr<sub>2</sub>O<sub>3</sub></b> | 1.01                                      | -0.18                                                 | 1          |
| <b>In<sub>2</sub>O<sub>3</sub></b> | 1.32                                      | -0.54                                                 | 1          |
| <b>La<sub>2</sub>O<sub>3</sub></b> | 1.19                                      | -0.42                                                 | 1          |
| <b>NiO</b>                         | 0.92                                      | -1.86                                                 | 1          |
| <b>Sb<sub>2</sub>O<sub>3</sub></b> | 0.98                                      | -0.32                                                 | 1          |
| <b>SnO<sub>2</sub></b>             | 0.90                                      | -0.40                                                 | 1          |
| <b>V<sub>2</sub>O<sub>3</sub></b>  | 1.10                                      | -0.19                                                 | 1          |
| <b>WO<sub>3</sub></b>              | 0.85                                      | -0.28                                                 | 1          |
| <b>ZnO</b>                         | 1.85                                      | 1.11                                                  | 1          |
| <b>ZrO<sub>2</sub></b>             | 1.51                                      | -0.24                                                 | 1          |
| <b>Mn<sub>2</sub>O<sub>3</sub></b> | 0.88                                      | -0.38                                                 | 1          |
| <b>CoO</b>                         | 0.85                                      | 2.51                                                  | 2          |
| <b>Fe<sub>2</sub>O<sub>3</sub></b> | 1.48                                      | 0.18                                                  | 2          |
| <b>SiO<sub>2</sub></b>             | 1.65                                      | 1.13                                                  | 2          |
| <b>TiO<sub>2</sub></b>             | 1.60                                      | -1.35                                                 | 2          |
| <b>Y<sub>2</sub>O<sub>3</sub></b>  | 1.51                                      | 1.33                                                  | 2          |



**Table S9.** Results on the applicability domain determination using: range-based method, geometrical-based method, distance-based method and standardization approach

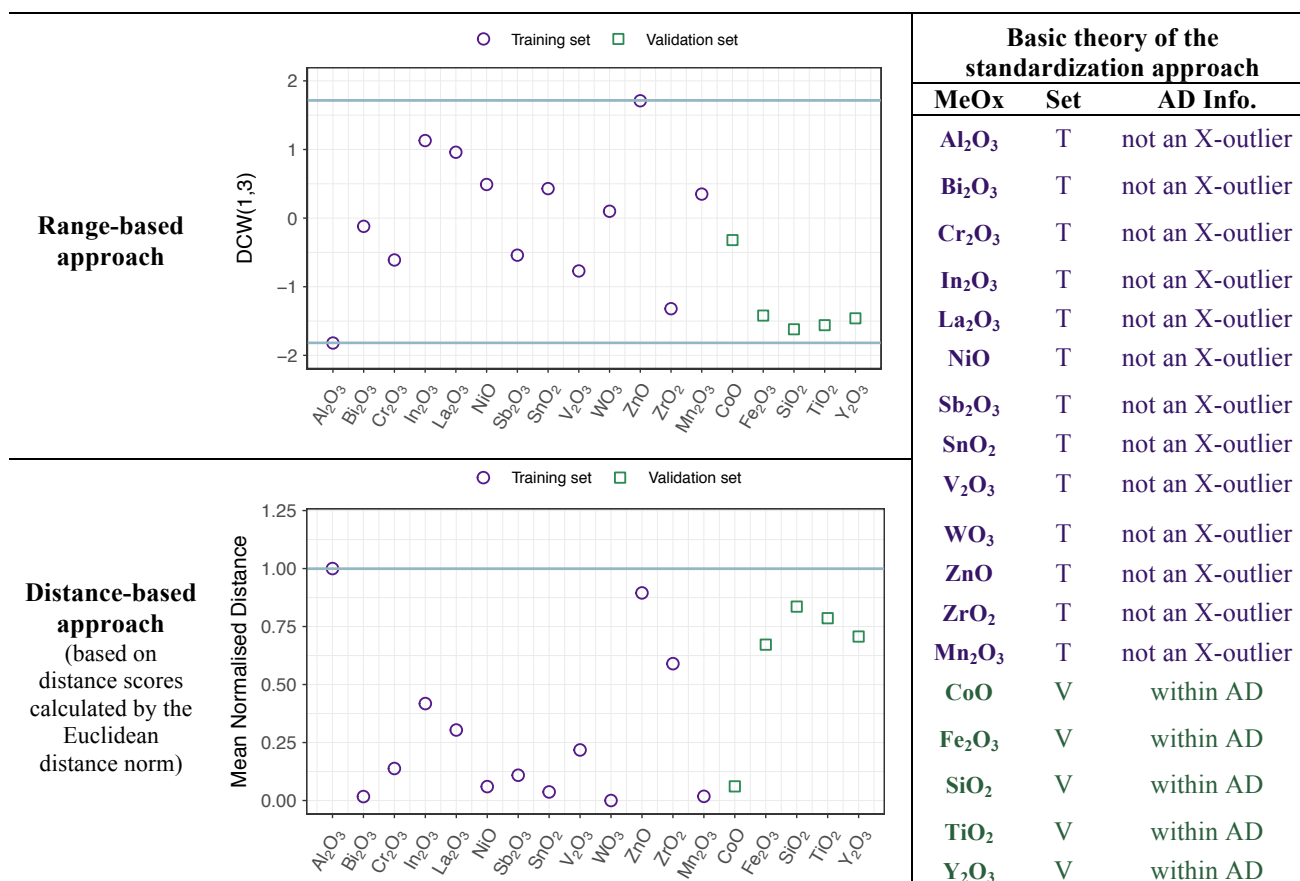

### Case Study 4

**Table S10.** Descriptors used for read-across model development along with experimentally observed and predicted values of nanotoxicity to *E. coli* bacteria for training and validation compounds (MeOx NPs) reported by Gajewicz<sup>[4]</sup>

| MeOx                           | $\Delta H_{Me^+}$<br>[kcal/mol] | Autoscaled<br>$\Delta H_{Me^+}$ | Set* | Experimental<br>$\log(EC_{50})^{-1}$ | Predicted<br>$\log(EC_{50})^{-1}$ | Residuals | Standardized<br>residuals | Leverages |
|--------------------------------|---------------------------------|---------------------------------|------|--------------------------------------|-----------------------------------|-----------|---------------------------|-----------|
| TiO <sub>2</sub>               | 1575.73                         | 1.11                            | T    | 1.74                                 | 2.10                              | -0.36     | -1.56                     | 0.35      |
| SnO <sub>2</sub>               | 1717.32                         | 1.43                            | T    | 2.01                                 | 1.81                              | 0.20      | 1.06                      | 0.49      |
| Sb <sub>2</sub> O <sub>3</sub> | 1233.06                         | 0.32                            | T    | 2.64                                 | 2.56                              | 0.08      | 0.51                      | 0.16      |
| Y <sub>2</sub> O <sub>3</sub>  | 837.15                          | -0.58                           | T    | 2.87                                 | 3.16                              | -0.29     | -1.24                     | 0.20      |
| La <sub>2</sub> O <sub>3</sub> | 1017.22                         | -0.17                           | T    | 2.87                                 | 2.78                              | 0.09      | 0.56                      | 0.15      |
| ZnO                            | 662.44                          | -0.99                           | T    | 3.45                                 | 3.45                              | 0.00      | 0.11                      | 0.30      |
| CoO                            | 601.80                          | -1.12                           | T    | 3.51                                 | 3.42                              | 0.09      | 0.55                      | 0.35      |
| ZrO <sub>2</sub>               | 1357.66                         | 0.61                            | V    | 2.15                                 | 2.41                              | -0.26     | -1.12                     | 0.20      |
| SiO <sub>2</sub>               | 1686.38                         | 1.36                            | V    | 2.20                                 | 1.99                              | 0.21      | 1.10                      | 0.45      |
| Fe <sub>2</sub> O <sub>3</sub> | 1408.29                         | 0.73                            | V    | 2.29                                 | 2.16                              | 0.13      | 0.75                      | 0.23      |
| Al <sub>2</sub> O <sub>3</sub> | 1187.83                         | 0.22                            | V    | 2.49                                 | 2.65                              | -0.16     | -0.65                     | 0.15      |
| Cr <sub>2</sub> O <sub>3</sub> | 1268.70                         | 0.41                            | V    | 2.51                                 | 2.65                              | -0.14     | -0.51                     | 0.17      |
| In <sub>2</sub> O <sub>3</sub> | 1271.13                         | 0.41                            | V    | 2.81                                 | 2.65                              | 0.16      | 0.89                      | 0.17      |
| Bi <sub>2</sub> O <sub>3</sub> | 1137.40                         | 0.10                            | V    | 2.82                                 | 2.73                              | 0.09      | 0.53                      | 0.14      |
| V <sub>2</sub> O <sub>3</sub>  | 1097.73                         | 0.01                            | V    | 3.14                                 | 2.81                              | 0.33      | 1.66                      | 0.14      |
| CuO                            | 706.25                          | -0.89                           | V    | 3.20                                 | 3.46                              | -0.26     | -1.10                     | 0.27      |
| NiO                            | 596.70                          | -1.14                           | V    | 3.45                                 | 3.51                              | -0.06     | -0.16                     | 0.36      |

\* T – training set; V – validation set;  $\Delta H_{Me^+}$  – the enthalpy of the formation of gaseous cations having the same oxidation state as that in the metal oxide structure.

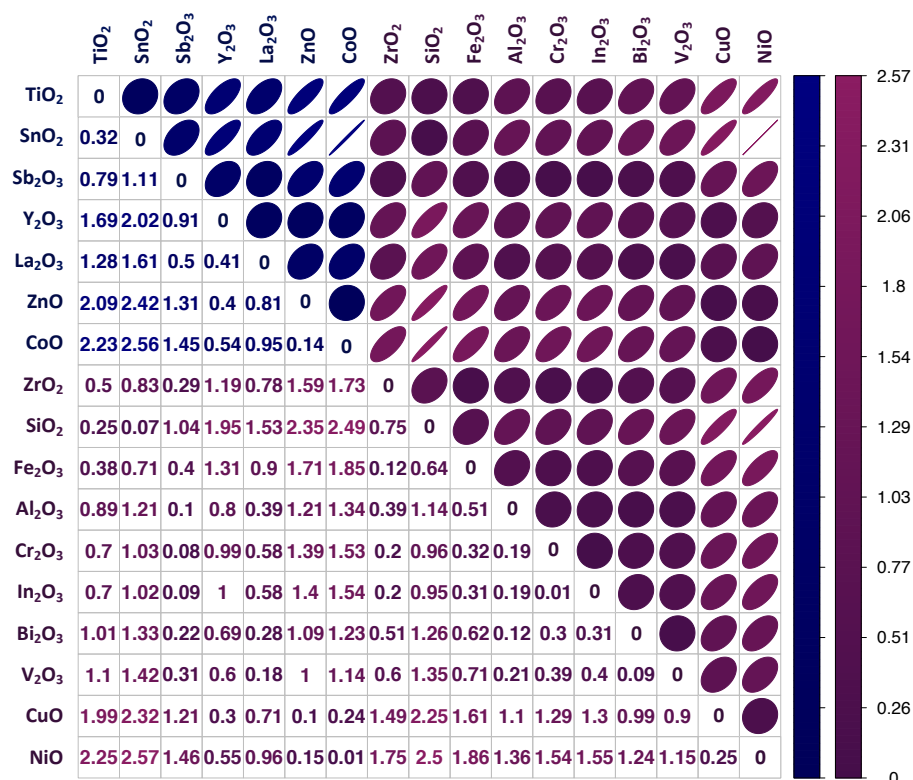

**Figure S4.** Euclidean distance matrix between the training (indicated in navy color) and validation (indicated in maroon color) compounds. The color intensity and shape of the ellipses displayed in the upper triangular part of a distance matrix reflect the values of the corresponding Euclidean distances expressed in numerical forms in the lower triangular part of this matrix. The smallest Euclidean distances (indicated as big circles) are considered as significant. In contrast, the highest distances that reflect the dissimilarity between compounds are considered as insignificant and shown as a thin ellipse.

**Table S11.** Input matrix data for 95% and 99% confidence interval boundaries estimation using the Student's *t*-distribution and developed in-house *R*-code

| MeOx                           | Average Euclidean distance | Standardized residuals | Set |
|--------------------------------|----------------------------|------------------------|-----|
| TiO <sub>2</sub>               | 1.40                       | -1.56                  | 1   |
| SnO <sub>2</sub>               | 1.67                       | 1.06                   | 1   |
| Sb <sub>2</sub> O <sub>3</sub> | 1.01                       | 0.51                   | 1   |
| Y <sub>2</sub> O <sub>3</sub>  | 0.99                       | -1.24                  | 1   |
| La <sub>2</sub> O <sub>3</sub> | 0.93                       | 0.56                   | 1   |
| ZnO                            | 1.20                       | 0.11                   | 1   |
| CoO                            | 1.31                       | 0.55                   | 1   |
| ZrO <sub>2</sub>               | 0.99                       | -1.12                  | 2   |
| SiO <sub>2</sub>               | 1.38                       | 1.10                   | 2   |
| Fe <sub>2</sub> O <sub>3</sub> | 1.04                       | 0.75                   | 2   |
| Al <sub>2</sub> O <sub>3</sub> | 0.85                       | -0.65                  | 2   |
| Cr <sub>2</sub> O <sub>3</sub> | 0.90                       | -0.51                  | 2   |
| In <sub>2</sub> O <sub>3</sub> | 0.90                       | 0.89                   | 2   |
| Bi <sub>2</sub> O <sub>3</sub> | 0.83                       | 0.53                   | 2   |
| V <sub>2</sub> O <sub>3</sub>  | 0.82                       | 1.66                   | 2   |
| CuO                            | 0.98                       | -1.10                  | 2   |
| NiO                            | 1.14                       | -0.16                  | 2   |

**Table S12.** Results on the applicability domain determination using: range-based method, geometrical-based method, distance-based method and standardization approach

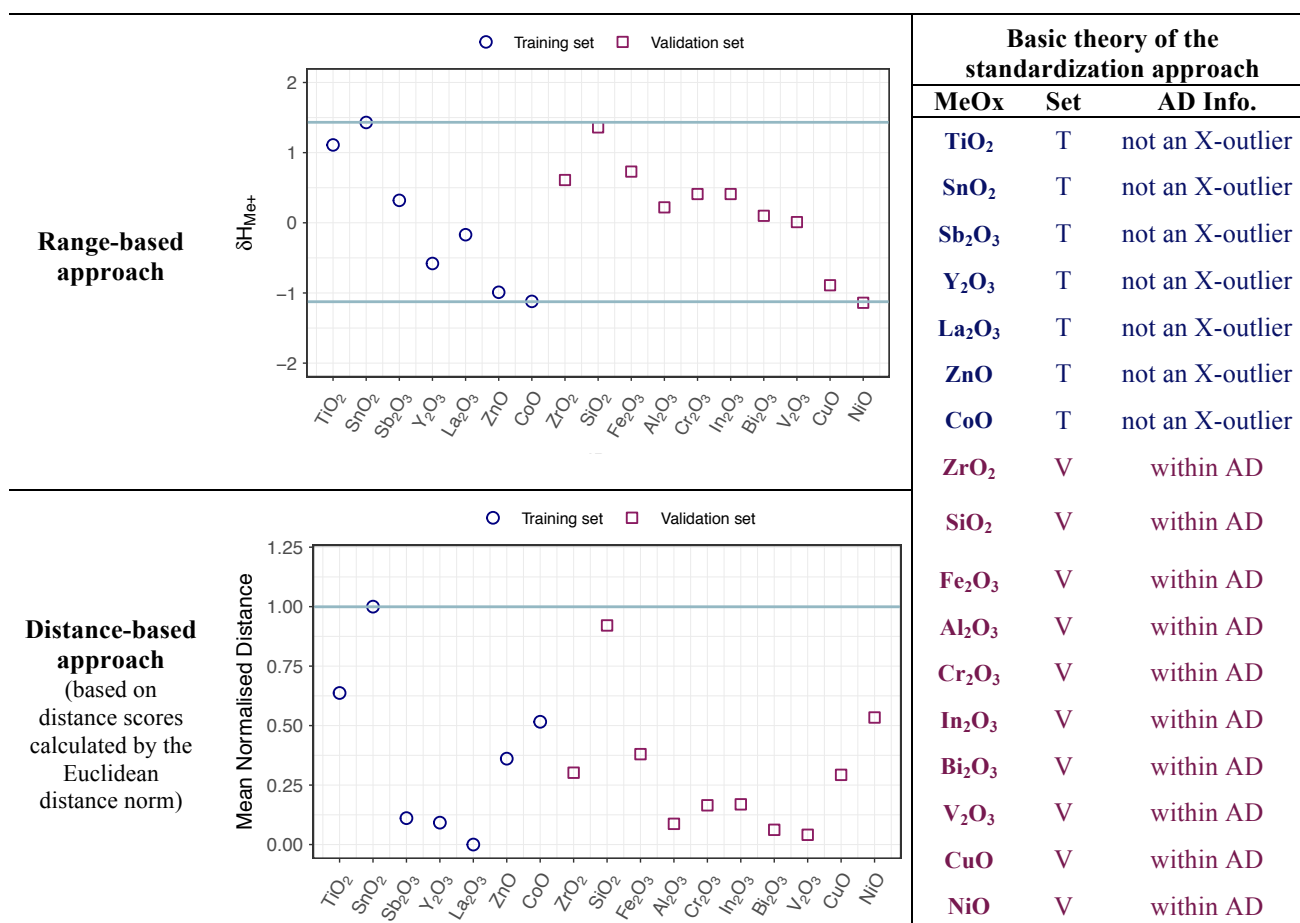

## References

1. Pathakoti, K.; Huang, M. J.; Watts, J. D.; He, X.; Hwang, H. M., Using experimental data of Escherichia coli to develop a QSAR model for predicting the photo-induced cytotoxicity of metal oxide nanoparticles. *Journal of photochemistry and photobiology. B, Biology* **2014**, *130*, 234-40.
2. Mu, Y.; Wu, F.; Zhao, Q.; Ji, R.; Qie, Y.; Zhou, Y.; Hu, Y.; Pang, C.; Hristozov, D.; Giesy, J. P.; Xing, B., Predicting Toxic Potencies of Metal Oxide Nanoparticles by Means of Nano-QSARs. *Nanotoxicology* **2016**, *10*, 1207-1214.
3. Pan, Y.; Li, T.; Cheng, J.; Telesca, D.; Zink, J. I.; Jiang, J., Nano-QSAR modeling for predicting the cytotoxicity of metal oxide nanoparticles using novel descriptors. *RSC Advances* **2016**, *6*, 25766-25775.
4. Gajewicz, A., What if the number of nanotoxicity data is too small for developing predictive Nano-QSAR models? An alternative read-across based approach for filling data gaps. *Nanoscale* **2017**, *9*, 8435-8448.
